# Supplementary material
Source: Springer Nature journal article supplement (https://www.springermedizin.de/resource/supplementary/13052_2013_298_MOESM2_ESM.pdf/9671798)

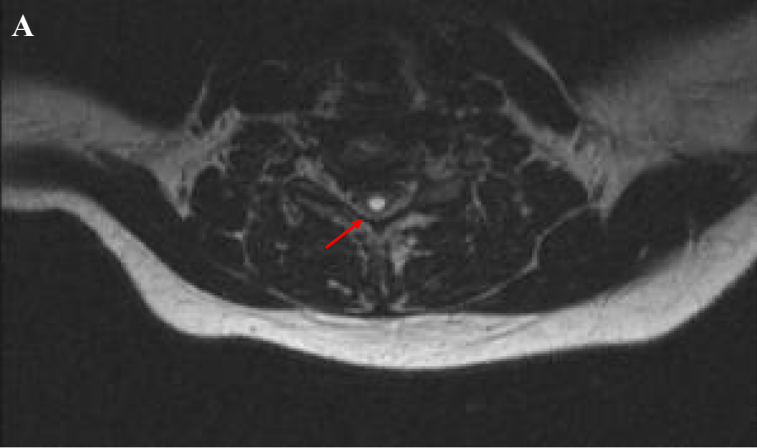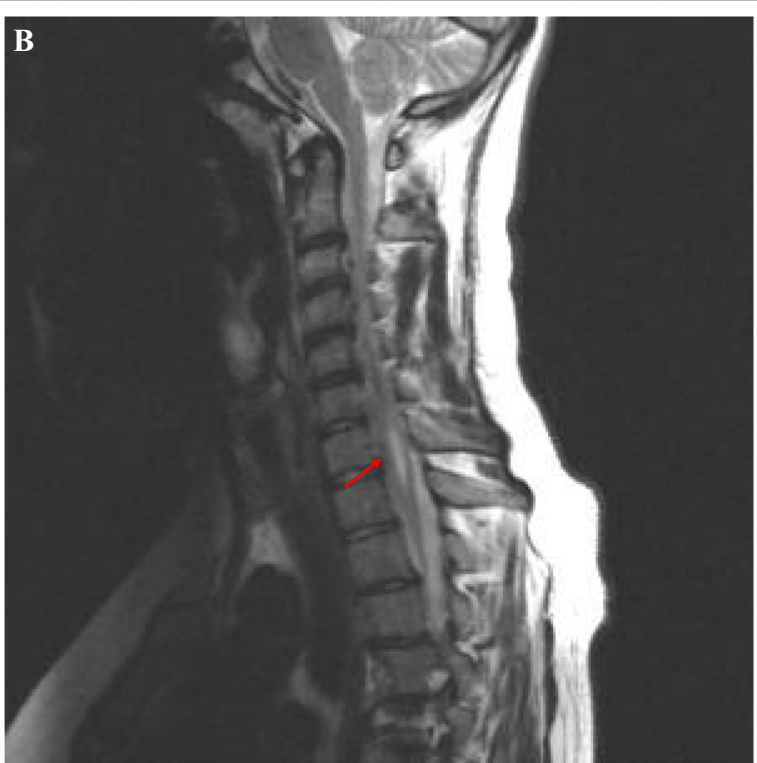

Supplement: MOESM2 [file 9671798]
